# Supplementary material for: Muscle Fatigue When Riding a Motorcycle: A Case Study
Source: MDPI journal article supplement (doi:10.3390/ijerph18157738), 2021-07-21
Supplement: s1 [file s1]

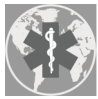

**Table S1.** Linear regression results of sEMG amplitude values (RMS) by rounds for each curve.

|              | Muscle  | Round 1        |        | Round 2        |        | Round 3        |        |   |             | Round 1        |        | Round 2        |        | Round 3        |        |   |
|--------------|---------|----------------|--------|----------------|--------|----------------|--------|---|-------------|----------------|--------|----------------|--------|----------------|--------|---|
|              |         | r <sup>2</sup> | Tr     | r <sup>2</sup> | Tr     | r <sup>2</sup> | Tr     |   |             | r <sup>2</sup> | Tr     | r <sup>2</sup> | Tr     | r <sup>2</sup> | Tr     |   |
|              |         |                |        |                |        |                |        |   |             |                |        |                |        |                |        |   |
| RIGHT CURVES | CURVE 1 | BB             | 0.59** | ↑              | 0.46*  | ↑              | 0.74** | ↑ | LEFT CURVES | CURVE 2        | 0.71** | ↑              | 0.58** | ↑              | 0.78** | ↑ |
|              |         | TB             | 0.58*  | ↑              | 0.69** | ↑              | 0.90** | ↑ |             |                | 0.31   | ↑              | 0.49*  | ↑              | 0.89** | ↑ |
|              |         | DA             | 0.81** | ↑              | 0.88** | ↑              | 0.86** | ↑ |             |                | 0.61** | ↑              | 0.82** | ↑              | 0.48*  | ↑ |
|              |         | DP             | 0.90** | ↑              | 0.63** | ↑              | 0.76** | ↑ |             |                | 0.77** | ↑              | 0.70** | ↑              | 0.82** | ↑ |
|              |         | FS             | 0.95** | ↑              | 0.44*  | ↓              | 0.72** | ↑ |             |                | 0.57*  | ↑              | 0.72** | ↓              | 0.76** | ↑ |
|              |         | CR             | 0.84** | ↑              | 0.82** | ↑              | 0.64** | ↑ |             |                | 0.83** | ↑              | 0.49*  | ↑              | 0.68** | ↑ |
|              |         | ED             | 0.64** | ↑              | 0.82** | ↑              | 0.85** | ↑ |             |                | 0.78** | ↑              | 0.50*  | ↑              | 0.71** | ↑ |
|              |         | PM             | 0.73** | ↑              | 0.55*  | ↑              | 0.73** | ↑ |             |                | 0.83** | ↑              | 0.68** | ↑              | 0.91** | ↑ |
|              | CURVE 4 | BB             | 0.43*  | ↑              | 0.66** | ↑              | 0.20   | ↑ |             | CURVE 3        | 0.01   | ↓              | 0.73** | ↑              | 0.79** | ↑ |
|              |         | TB             | 0.58*  | ↑              | 0.40** | ↑              | 0.85** | ↑ |             |                | 0.17   | ↑              | 0.51*  | ↑              | 0.79** | ↑ |
|              |         | DA             | 0.50*  | ↑              | 0.48*  | ↑              | 0.31   | ↑ |             |                | 0.03   | ↑              | 0.83** | ↑              | 0.50*  | ↑ |
|              |         | DP             | 0.90** | ↑              | 0.85** | ↑              | 0.84** | ↑ |             |                | 0.73** | ↑              | 0.93** | ↑              | 0.38*  | ↑ |
|              |         | FS             | 0.26   | ↑              | 0.69** | ↓              | 0.93** | ↑ |             |                | 0.05   | ↑              | 0.58** | ↓              | 0.84** | ↑ |
|              |         | CR             | 0.52*  | ↑              | 0.76** | ↑              | 0.69** | ↑ |             |                | 0.11   | ↑              | 0.74** | ↑              | 0.77** | ↑ |
|              |         | ED             | 0.53*  | ↑              | 0.56*  | ↑              | 0.83** | ↑ |             |                | 0.44*  | ↑              | 0.63** | ↑              | 0.79** | ↑ |
|              |         | PM             | 0.21   | ↑              | 0.73** | ↑              | 0.79** | ↑ |             |                | 0.72** | ↑              | 0.26   | ↑              | 0.78** | ↑ |
|              | CURVE 6 | BB             | 0.72** | ↑              | 0.34   | ↑              | 0.89** | ↑ |             | CURVE 5        | 0.21   | ↑              | 0.85** | ↑              | 0.73** | ↑ |
|              |         | TB             | 0.43*  | ↑              | 0.62** | ↑              | 0.82** | ↑ |             |                | 0.03   | ↑              | 0.62** | ↑              | 0.87** | ↑ |
|              |         | DA             | 0.56*  | ↑              | 0.49*  | ↑              | 0.89** | ↑ |             |                | 0.25   | ↑              | 0.86** | ↑              | 0.78** | ↑ |
|              |         | DP             | 0.58*  | ↑              | 0.84** | ↑              | 0.75** | ↑ |             |                | 0.68** | ↑              | 0.58*  | ↑              | 0.75** | ↑ |
|              |         | FS             | 0.47*  | ↑              | 0.84** | ↑              | 0.78** | ↑ |             |                | 0.02   | ↓              | 0.90** | ↓              | 0.90** | ↑ |
|              |         | CR             | 0.08   | ↓              | 0.64** | ↑              | 0.73** | ↑ |             |                | 0.03   | ↓              | 0.74** | ↑              | 0.81** | ↑ |
|              |         | ED             | 0.26   | ↑              | 0.61** | ↑              | 0.52*  | ↑ |             |                | 0.37   | ↑              | 0.73** | ↑              | 0.74** | ↑ |
|              |         | PM             | 0.76** | ↑              | 0.52*  | ↑              | 0.63*  | ↑ |             |                | 0.29   | ↑              | 0.56*  | ↑              | 0.62*  | ↑ |

r<sup>2</sup>: coefficient of determination for correlation between RMS and time-course of the laps; Tr: Trend, sign of regression coefficients; ↑ positive regression; ↓ negative regression; \* Slopes significantly different from zero ( $p < 0.05$ ); \*\*Slopes significantly different from zero ( $p < 0.01$ ); BB: Biceps Brachii; TB: Triceps Brachii; DA: Anterior part of the Deltoid; DP: Posterior part of the Deltoid; FS: Flexor Digitorum Superficialis; CR: Extensor Carpi Radialis; ED: Extensor Digitorum Communis; PM: Pectoralis Major.

**Table S2.** Linear regression results of sEMG frequency spectrum (MF) by rounds for each curve.

|              |         | Round 1        |        | Round 2        |        | Round 3        |        |             |       | Round 1        |    | Round 2        |    | Round 3        |    |        |   |
|--------------|---------|----------------|--------|----------------|--------|----------------|--------|-------------|-------|----------------|----|----------------|----|----------------|----|--------|---|
| RIGHT CURVES | Muscle  | r <sup>2</sup> | Tr     | r <sup>2</sup> | Tr     | r <sup>2</sup> | Tr     | LEFT CURVES |       | r <sup>2</sup> | Tr | r <sup>2</sup> | Tr | r <sup>2</sup> | Tr |        |   |
|              | CURVE 1 | BB             | 0.43*  | ↓              | 0.06   | ↑              | 0.73** |             | ↑     | CURVE 2        |    | 0.19           | ↑  | 0.21           | ↓  | 0.52*  | ↑ |
|              |         | TB             | 0.42*  | ↑              | 0.54*  | ↑              | 0.06   |             | ↑     |                |    | 0.18           | ↑  | 0.86**         | ↑  | 0.38   | ↓ |
|              |         | DA             | 0.12   | ↓              | 0.02   | ↑              | 0.31   |             | ↓     |                |    | 0.37           | ↓  | 0.32           | ↑  | 0.87** | ↓ |
|              |         | DP             | 0.40   | ↑              | 0.60** | ↑              | 0.36   |             | ↓     |                |    | 0.11           | ↓  | 0.43*          | ↑  | 0.43   | ↓ |
|              |         | FS             | 0.12   | ↑              | 0.47*  | ↑              | 0.66** |             | ↓     |                |    | 0.51*          | ↓  | 0.42*          | ↓  | 0.70** | ↓ |
|              |         | CR             | 0.61** | ↑              | 0.84** | ↑              | 0.77** |             | ↓     |                |    | 0.47*          | ↓  | 0.84**         | ↑  | 0.80** | ↓ |
|              |         | ED             | 0.85** | ↓              | 0.45*  | ↓              | 0.64** |             | ↓     |                |    | 0.47**         | ↓  | 0.59**         | ↑  | 0.60*  | ↓ |
|              |         | PM             | 0.06   | ↑              | 0.41*  | ↓              | 0.28   |             | ↓     |                |    | 0.47**         | ↓  | 0.29           | ↓  | 0.65** | ↓ |
|              | CURVE 4 | BB             | 0.02   | ↑              | 0.67** | ↓              | 0.68** |             | ↑     | CURVE 3        |    | 0.02           | ↑  | 0.05           | ↑  | 0.01   | ↓ |
|              |         | TB             | 0.54*  | ↑              | 0.61** | ↑              | 0.66** |             | ↓     |                |    | 0.07           | ↑  | 0.51*          | ↑  | 0.06   | ↓ |
|              |         | DA             | 0.01   | ↑              | 0.20   | ↑              | 0.32   |             | ↑     |                |    | 0.68**         | ↓  | 0.01           | ↑  | 0.71** | ↓ |
|              |         | DP             | 0.63** | ↑              | 0.44*  | ↑              | 0.00   |             | ↑     |                |    | 0.01           | ↑  | 0.41*          | ↑  | 0.52*  | ↓ |
|              |         | FS             | 0.21   | ↑              | 0.46*  | ↓              | 0.82** |             | ↓     |                |    | 0.00           | ↑  | 0.12           | ↑  | 0.20   | ↓ |
| CR           |         | 0.35           | ↑      | 0.84**         | ↑      | 0.75**         | ↓      |             | 0.55* |                | ↑  | 0.74**         | ↑  | 0.81**         | ↓  |        |   |

|         |    |        |   |        |   |        |   |         |       |   |        |   |        |   |
|---------|----|--------|---|--------|---|--------|---|---------|-------|---|--------|---|--------|---|
| CURVE 6 | ED | 0.39   | ↓ | 0.02   | ↓ | 0.61*  | ↓ | CURVE 5 | 0.01  | ↓ | 0.60** | ↑ | 0.87** | ↓ |
|         | PM | 0.00   | ↓ | 0.10   | ↓ | 0.68** | ↑ |         | 0.53* | ↓ | 0.00   | ↓ | 0.72** | ↓ |
|         | BB | 0.13   | ↑ | 0.42*  | ↑ | 0.71** | ↑ |         | 0.00  | ↓ | 0.62** | ↓ | 0.51*  | ↓ |
|         | TB | 0.64** | ↑ | 0.73** | ↑ | 0.48*  | ↑ |         | 0.58* | ↑ | 0.42*  | ↓ | 0.68** | ↓ |
|         | DA | 0.05   | ↓ | 0.66** | ↓ | 0.71** | ↑ |         | 0.37  | ↓ | 0.49*  | ↓ | 0.33   | ↓ |
|         | DP | 0.10   | ↑ | 0.42*  | ↑ | 0.62*  | ↑ |         | 0.14  | ↑ | 0.17   | ↑ | 0.37   | ↓ |
|         | FS | 0.62** | ↓ | 0.49*  | ↑ | 0.78** | ↓ |         | 0.44* | ↓ | 0.45*  | ↓ | 0.88** | ↓ |
|         | CR | 0.45*  | ↑ | 0.86** | ↑ | 0.70** | ↓ |         | 0.56* | ↑ | 0.85** | ↑ | 0.93** | ↓ |
|         | ED | 0.90** | ↓ | 0.69** | ↓ | 0.82** | ↓ |         | 0.24  | ↓ | 0.22   | ↓ | 0.86** | ↓ |
|         | PM | 0.10   | ↑ | 0.56*  | ↑ | 0.02   | ↓ |         | 0.06  | ↑ | 0.68** | ↓ | 0.28   | ↓ |

$r^2$ : coefficient of determination for correlation between MF and time-course of the laps; Tr: Trend, sign of regression coefficients; ↑ positive regression; ↓ negative regression; \* Slopes significantly different from zero ( $p < 0.05$ ); \*\*Slopes significantly different from zero ( $p < 0.01$ ); BB: Biceps Brachii; TB: Triceps Brachii; DA: Anterior part of the Deltoid; DP: Posterior part of the Deltoid; FS: Flexor Digitorum Superficialis; CR: Extensor Carpi Radialis; ED: Extensor Digitorum Communis; PM: Pectoralis Major.
